# Supplementary material
Source: PubMed Central journal article supplement (PMC4894539)
Supplement: NIHMS760170-supplement-2.pdf [file NIHMS760170-supplement-2.pdf]

**Supplementary Table 1: Selection of scaffolding systems for membrane proteins**

| Name                    | Scaffold Type                                                                                | Adjusts to size of membrane protein                                                      | Lipid environment                                 | Reference                                                                                                                                                                                                                                                        |
|-------------------------|----------------------------------------------------------------------------------------------|------------------------------------------------------------------------------------------|---------------------------------------------------|------------------------------------------------------------------------------------------------------------------------------------------------------------------------------------------------------------------------------------------------------------------|
| Peptitergents           | Peptide, 24-residue amphipathic $\alpha$ -helix                                              | Yes                                                                                      | No                                                | Schafmeister, C. E., Miercke, L. J. & Stroud, R. M. Structure at 2.5 Å of a designed peptide that maintains solubility of membrane proteins. <i>Science</i> 262, 734-738 (1993).                                                                                 |
| Lipopeptide detergents  | Peptide, 25-residue amphipathic $\alpha$ -helix with fatty acyl chains linked to side chains | Yes                                                                                      | No (fatty acyl chains to mimic lipid environment) | McGregor, C. L. et al. Lipopeptide detergents designed for the structural study of membrane proteins. <i>Nature biotechnology</i> 21, 171-176, doi:10.1038/nbt776 (2003).                                                                                        |
| $\beta$ -sheet peptides | acetyl-(octyl)Gly-Ser-Leu-Ser-Leu-Asp-(octyl)Gly-Asp-NH <sub>2</sub>                         | Yes                                                                                      | No                                                | Tao, H. et al. Engineered nanostructured beta-sheet peptides protect membrane proteins. <i>Nature methods</i> 10, 759-761, doi:10.1038/nmeth.2533 (2013).                                                                                                        |
| Amphipols               | Amphiphilic polymer                                                                          | Yes                                                                                      | No                                                | Tribet, C., Audebert, R. & Popot, J. L. Amphipols: polymers that keep membrane proteins soluble in aqueous solutions. <i>Proceedings of the National Academy of Sciences of the United States of America</i> 93, 15047-15050 (1996).                             |
| SMALPs                  | Styrene Maleic Acid Copolymer                                                                | No                                                                                       | Yes                                               | Knowles, T. J. et al. Membrane proteins solubilized intact in lipid containing nanoparticles bounded by styrene maleic acid copolymer. <i>Journal of the American Chemical Society</i> 131, 7484-7485, doi:10.1021/ja810046q (2009).                             |
| Nanodiscs               | Apolipoprotein A-1                                                                           | No                                                                                       | Yes                                               | Bayburt, T. H., Carlson, J. W. & Sligar, S. G. Reconstitution and imaging of a membrane protein in a nanometer-size phospholipid bilayer. <i>Journal of structural biology</i> 123, 37-44, doi:10.1006/jsbi.1998.4007 (1998).                                    |
| Macrodiscs              | 14-residue peptide derived from Apolipoprotein A-1                                           | No (Diameter can be varied by at least 3-fold by changing the lipid:peptide molar ratio) | Yes                                               | Park, S. H. et al. Nanodiscs versus macrodiscs for NMR of membrane proteins. <i>Biochemistry</i> 50, 8983-8985, doi:10.1021/bi201289c (2011).                                                                                                                    |
| $\Delta$ MSP            | Truncated version of Apolipoprotein A-1                                                      | No (Diameter can be varied by changing the molar ratio of $\Delta$ MSP to lipid)         | Yes                                               | Wang, X., Mu, Z., Li, Y., Bi, Y. & Wang, Y. Smaller Nanodiscs are Suitable for Studying Protein Lipid Interactions by Solution NMR. <i>The protein journal</i> 34, 205-211, doi:10.1007/s10930-015-9613-2 (2015).                                                |
| $\Delta$ H-MSP variants | Truncated versions of Apolipoprotein A-1                                                     | No (Diameter can be varied by changing the molar ratio of scaffold protein to lipid)     | Yes                                               | Hagn, F., Eitzkorn, M., Raschle, T. & Wagner, G. Optimized phospholipid bilayer nanodiscs facilitate high-resolution structure determination of membrane proteins. <i>Journal of the American Chemical Society</i> 135, 1919-1925, doi:10.1021/ja310901f (2013). |
| Salipro                 | Saposin lipoproteins                                                                         | Yes                                                                                      | Yes                                               | Frauenfeld, J. et al. A novel lipoprotein nanoparticle system for membrane proteins. <i>Nature Methods</i> (2016)                                                                                                                                                |
